# Supplementary material for: The Nursehound Scyliorhinus stellaris Mitochondrial Genome—Phylogeny, Relationships among Scyliorhinidae and Variability in Waters of the Balearic Islands
Source: MDPI journal article supplement (doi:10.3390/ijms231810355), 2022-09-08
Supplement: s1 [file s1]

## Supplementary data

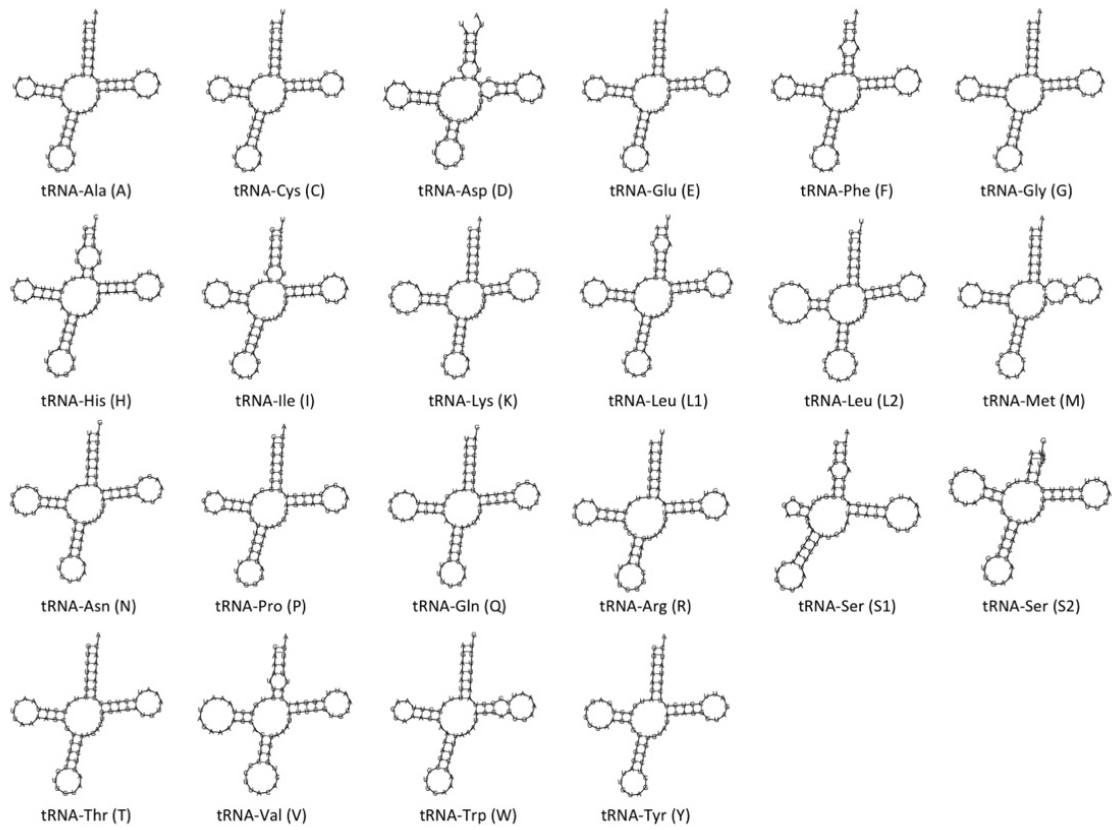

**Figure S1** Putative secondary structure of the predicted 22 tRNAs based on the *S. stellaris* mitogenome sequence

| <i>S. canicula</i> |       |      |     |     | <i>S. stellaris</i> vs. <i>S. canicula</i> changes |     |     |         |     |    |       |          |              |             |
|--------------------|-------|------|-----|-----|----------------------------------------------------|-----|-----|---------|-----|----|-------|----------|--------------|-------------|
| Gene lenght        | Codon |      |     | AA  | nucleotide position                                |     |     |         | ts  | tv | synon | nonsynon | n. AA change | % AA change |
|                    | Start | Stop | AA  |     | 1st                                                | 2nd | 3rd | overall |     |    |       |          |              |             |
| COI                | 1554  | GTG  | TAA | 517 | 10                                                 | 3   | 93  | 106     | 84  | 22 | 98    | 8        | 6            | 1.16        |
| COII               | 699   | ATG  | AGA | 232 | 8                                                  | 4   | 41  | 53      | 36  | 17 | 42    | 11       | 11           | 4.74        |
| COIII              | 786   | ATG  | TAA | 261 | 2                                                  | 1   | 26  | 29      | 22  | 7  | 27    | 2        | 2            | 0.77        |
| cytB               | 1144  | ATG  | T   | 381 | 18                                                 | 5   | 68  | 91      | 75  | 16 | 74    | 17       | 17           | 4.46        |
| ATP6               | 684   | ATG  | TAA | 227 | 7                                                  | 0   | 28  | 35      | 28  | 7  | 31    | 4        | 4            | 1.76        |
| ATP8               | 168   | ATG  | TAA | 55  | 2                                                  | 1   | 7   | 10      | 9   | 1  | 6     | 4        | 4            | 7.27        |
| ND1                | 975   | ATG  | TAA | 324 | 16                                                 | 4   | 68  | 88      | 72  | 16 | 79    | 9        | 8            | 2.47        |
| ND2                | 1047  | ATG  | TAA | 348 | 12                                                 | 1   | 59  | 72      | 63  | 9  | 67    | 5        | 5            | 1.44        |
| ND3                | 351   | ATG  | TAA | 116 | 2                                                  | 0   | 13  | 15      | 10  | 5  | 12    | 3        | 3            | 2.59        |
| ND4                | 1381  | ATG  | T   | 460 | 18                                                 | 8   | 73  | 99      | 82  | 17 | 80    | 19       | 17           | 3.70        |
| ND4L               | 297   | ATG  | TAA | 98  | 3                                                  | 1   | 14  | 18      | 17  | 1  | 17    | 1        | 1            | 1.02        |
| ND5                | 1830  | ATG  | TAA | 609 | 22                                                 | 6   | 99  | 127     | 109 | 18 | 108   | 18       | 16           | 2.63        |
| ND6                | 522   | ATG  | TAG | 173 | 5                                                  | 5   | 40  | 50      | 45  | 5  | 39    | 9        | 6            | 3.47        |

  

| <i>S. torazame</i> |       |      |     |     | <i>S. stellaris</i> vs. <i>S. torazame</i> changes |     |     |         |     |    |       |          |              |             |
|--------------------|-------|------|-----|-----|----------------------------------------------------|-----|-----|---------|-----|----|-------|----------|--------------|-------------|
| Gene lenght        | Codon |      |     | AA  | nucleotide position                                |     |     |         | ts  | tv | synon | nonsynon | n. AA change | % AA change |
|                    | Start | Stop | AA  |     | 1st                                                | 2nd | 3rd | overall |     |    |       |          |              |             |
| COI                | 1554  | GTG  | TAA | 517 | 26                                                 | 1   | 162 | 189     | 143 | 46 | 180   | 9        | 7            | 1.35        |
| COII               | 699   | ATG  | AGA | 232 | 10                                                 | 4   | 54  | 68      | 44  | 24 | 55    | 12       | 12           | 5.17        |
| COIII              | 786   | ATG  | TAA | 261 | 7                                                  | 3   | 60  | 70      | 48  | 22 | 63    | 7        | 7            | 2.68        |
| cytB               | 1146  | ATG  | TAG | 381 | 40                                                 | 10  | 123 | 173     | 125 | 48 | 130   | 43       | 35           | 9.19        |
| ATP6               | 684   | ATG  | TAA | 227 | 23                                                 | 3   | 58  | 84      | 62  | 22 | 69    | 15       | 13           | 5.73        |
| ATP8               | 168   | ATG  | TAA | 55  | 8                                                  | 2   | 14  | 24      | 20  | 4  | 16    | 8        | 6            | 10.91       |
| ND1                | 975   | ATG  | TAA | 324 | 18                                                 | 2   | 106 | 126     | 87  | 39 | 111   | 15       | 13           | 4.01        |
| ND2                | 1047  | ATG  | TAA | 348 | 40                                                 | 7   | 110 | 157     | 109 | 48 | 123   | 34       | 26           | 7.47        |
| ND3                | 351   | ATG  | TAA | 116 | 8                                                  | 5   | 33  | 46      | 36  | 10 | 33    | 13       | 12           | 10.34       |
| ND4                | 1381  | ATG  | T   | 460 | 38                                                 | 16  | 136 | 190     | 141 | 49 | 142   | 48       | 41           | 8.91        |
| ND4L               | 297   | ATG  | TAA | 98  | 7                                                  | 1   | 34  | 42      | 32  | 10 | 39    | 3        | 3            | 3.06        |
| ND5                | 1830  | ATG  | TAA | 609 | 45                                                 | 14  | 190 | 249     | 188 | 61 | 196   | 52       | 41           | 6.73        |
| ND6                | 522   | ATG  | TAA | 173 | 12                                                 | 12  | 67  | 91      | 63  | 28 | 66    | 24       | 18           | 10.40       |

  

| <i>P. pantherinum</i> |       |      |     |     | <i>S. stellaris</i> vs. <i>P. pantherinum</i> changes |     |     |         |     |    |       |          |              |             |
|-----------------------|-------|------|-----|-----|-------------------------------------------------------|-----|-----|---------|-----|----|-------|----------|--------------|-------------|
| Gene lenght           | Codon |      |     | AA  | nucleotide position                                   |     |     |         | ts  | tv | synon | nonsynon | n. AA change | % AA change |
|                       | Start | Stop | AA  |     | 1st                                                   | 2nd | 3rd | overall |     |    |       |          |              |             |
| COI                   | 1554  | GTG  | TAA | 517 | 17                                                    | 1   | 154 | 172     | 137 | 35 | 165   | 7        | 6            | 1.16        |
| COII                  | 699   | ATG  | AGA | 232 | 10                                                    | 4   | 53  | 67      | 48  | 19 | 55    | 12       | 12           | 5.17        |
| COIII                 | 786   | ATG  | TAA | 261 | 4                                                     | 2   | 54  | 60      | 49  | 11 | 57    | 3        | 3            | 1.15        |
| cytB                  | 1144  | ATG  | T   | 381 | 30                                                    | 4   | 103 | 137     | 107 | 30 | 110   | 27       | 23           | 6.04        |
| ATP6                  | 684   | ATG  | TAA | 227 | 19                                                    | 2   | 49  | 70      | 56  | 14 | 60    | 10       | 8            | 3.52        |
| ATP8                  | 168   | ATG  | TAA | 55  | 4                                                     | 2   | 11  | 17      | 15  | 2  | 10    | 7        | 7            | 12.73       |
| ND1                   | 975   | ATG  | TAA | 324 | 16                                                    | 2   | 93  | 111     | 88  | 23 | 101   | 10       | 10           | 3.09        |
| ND2                   | 1047  | ATG  | TAA | 348 | 28                                                    | 9   | 92  | 129     | 108 | 21 | 105   | 24       | 21           | 6.03        |
| ND3                   | 351   | ATG  | TAA | 116 | 4                                                     | 1   | 25  | 30      | 28  | 2  | 26    | 4        | 4            | 3.45        |
| ND4                   | 1381  | ATG  | T   | 460 | 40                                                    | 9   | 115 | 164     | 133 | 31 | 126   | 38       | 34           | 7.39        |
| ND4L                  | 297   | ATG  | TAA | 98  | 3                                                     | 4   | 28  | 35      | 28  | 7  | 29    | 6        | 5            | 5.10        |
| ND5                   | 1830  | ATG  | TAA | 609 | 39                                                    | 18  | 165 | 222     | 193 | 29 | 180   | 41       | 39           | 6.40        |
| ND6                   | 519   | ATG  | TAA | 172 | 11                                                    | 11  | 42  | 64      | 48  | 16 | 42    | 22       | 19           | 11.05       |

  

| <i>C. umbratile</i> |       |      |     |     | <i>S. stellaris</i> vs. <i>C. umbratile</i> changes |     |     |         |     |    |       |          |              |             |
|---------------------|-------|------|-----|-----|-----------------------------------------------------|-----|-----|---------|-----|----|-------|----------|--------------|-------------|
| Gene lenght         | Codon |      |     | AA  | nucleotide position                                 |     |     |         | ts  | tv | synon | nonsynon | n. AA change | % AA change |
|                     | Start | Stop | AA  |     | 1st                                                 | 2nd | 3rd | overall |     |    |       |          |              |             |
| COI                 | 1554  | GTG  | TAA | 517 | 23                                                  | 1   | 147 | 171     | 135 | 36 | 164   | 7        | 6            | 1.16        |
| COII                | 699   | ATG  | AGA | 232 | 14                                                  | 4   | 55  | 73      | 48  | 25 | 59    | 14       | 13           | 5.60        |
| COIII               | 786   | ATG  | TAA | 261 | 8                                                   | 1   | 54  | 63      | 44  | 19 | 59    | 4        | 5            | 1.92        |
| cytB                | 1146  | ATG  | TAG | 381 | 29                                                  | 8   | 129 | 166     | 124 | 42 | 136   | 30       | 27           | 7.09        |
| ATP6                | 684   | ATG  | TAA | 227 | 17                                                  | 2   | 56  | 75      | 54  | 21 | 64    | 11       | 9            | 3.96        |
| ATP8                | 168   | ATG  | TAA | 55  | 8                                                   | 2   | 14  | 24      | 19  | 5  | 16    | 8        | 5            | 9.09        |
| ND1                 | 975   | ATG  | TAA | 324 | 21                                                  | 2   | 95  | 118     | 88  | 30 | 105   | 13       | 11           | 3.40        |
| ND2                 | 1047  | ATG  | TAA | 348 | 38                                                  | 3   | 94  | 135     | 93  | 42 | 112   | 23       | 19           | 5.46        |
| ND3                 | 351   | ATG  | TAA | 116 | 9                                                   | 5   | 26  | 40      | 35  | 5  | 29    | 11       | 10           | 8.62        |
| ND4                 | 1381  | ATG  | T   | 460 | 48                                                  | 12  | 128 | 188     | 146 | 42 | 139   | 49       | 42           | 9.13        |
| ND4L                | 297   | ATG  | TAA | 98  | 6                                                   | 1   | 32  | 39      | 30  | 9  | 34    | 5        | 4            | 4.08        |
| ND5                 | 1830  | ATG  | TAA | 609 | 40                                                  | 14  | 185 | 239     | 183 | 56 | 192   | 46       | 37           | 6.08        |
| ND6                 | 522   | ATG  | TAA | 173 | 16                                                  | 11  | 58  | 85      | 63  | 22 | 56    | 27       | 23           | 13.29       |

  

| <i>C. fasciatum</i> |       |      |     |     | <i>S. stellaris</i> vs. <i>C. fasciatum</i> changes |     |     |         |     |    |       |          |              |             |
|---------------------|-------|------|-----|-----|-----------------------------------------------------|-----|-----|---------|-----|----|-------|----------|--------------|-------------|
| Gene lenght         | Codon |      |     | AA  | nucleotide position                                 |     |     |         | ts  | tv | synon | nonsynon | n. AA change | % AA change |
|                     | Start | Stop | AA  |     | 1st                                                 | 2nd | 3rd | overall |     |    |       |          |              |             |
| COI                 | 1554  | GTG  | TAA | 517 | 18                                                  | 1   | 151 | 170     | 136 | 34 | 164   | 6        | 11           | 2.13        |
| COII                | 699   | ATG  | AGA | 232 | 14                                                  | 4   | 60  | 78      | 55  | 23 | 65    | 13       | 13           | 5.60        |
| COIII               | 786   | ATG  | TAA | 261 | 8                                                   | 2   | 59  | 69      | 52  | 17 | 66    | 3        | 3            | 1.15        |
| cytB                | 1147  | ATG  | TAG | 381 | 29                                                  | 6   | 124 | 159     | 123 | 36 | 133   | 26       | 24           | 6.30        |
| ATP6                | 684   | ATG  | TAA | 227 | 21                                                  | 1   | 61  | 83      | 60  | 23 | 73    | 10       | 8            | 3.52        |
| ATP8                | 168   | ATG  | TAA | 55  | 8                                                   | 2   | 14  | 24      | 22  | 2  | 16    | 8        | 5            | 9.09        |
| ND1                 | 975   | ATG  | TAA | 324 | 21                                                  | 1   | 91  | 113     | 86  | 27 | 103   | 10       | 10           | 3.09        |
| ND2                 | 1047  | ATG  | TAA | 348 | 39                                                  | 10  | 104 | 153     | 110 | 43 | 119   | 34       | 30           | 8.62        |
| ND3                 | 351   | ATG  | TAA | 116 | 9                                                   | 5   | 25  | 39      | 34  | 5  | 28    | 11       | 11           | 9.48        |
| ND4                 | 1381  | ATG  | T   | 460 | 43                                                  | 13  | 152 | 208     | 169 | 39 | 166   | 42       | 42           | 9.13        |
| ND4L                | 297   | ATG  | TAA | 98  | 5                                                   | 1   | 35  | 41      | 32  | 9  | 37    | 4        | 4            | 4.08        |
| ND5                 | 1830  | ATG  | TAA | 609 | 50                                                  | 11  | 179 | 240     | 187 | 53 | 191   | 48       | 39           | 6.40        |
| ND6                 | 522   | ATG  | TAA | 173 | 11                                                  | 8   | 53  | 72      | 54  | 18 | 51    | 20       | 16           | 9.25        |

**Table S1** Nucleotide substitutions and Amino acid changes in Scyliorhininae species versus *S. stellaris*

|                               |                                                                                                                                                                                              |  |
|-------------------------------|----------------------------------------------------------------------------------------------------------------------------------------------------------------------------------------------|--|
| Carcharhinus_acronotus        | 0.0864                                                                                                                                                                                       |  |
| Carcharhinus_amblyrhynchoides | 0.0831 0.0888                                                                                                                                                                                |  |
| Carcharhinus_amblohenis       | 0.0790 0.0870 0.0850                                                                                                                                                                         |  |
| Carcharhinus_falciformis      | 0.0700 0.0795 0.0758 0.0696                                                                                                                                                                  |  |
| Carcharhinus_obscurus         | 0.0895 0.0804 0.0930 0.0901 0.0857                                                                                                                                                           |  |
| Carcharhinus_melanopterus     | 0.0827 0.0879 0.0868 0.0812 0.0689 0.0961                                                                                                                                                    |  |
| Carcharhinus_sorrah           | 0.1436 0.1448 0.1383 0.1421 0.1399 0.1462 0.1412                                                                                                                                             |  |
| Eusphyras_blochii             | 0.1513 0.1505 0.1492 0.1502 0.1442 0.1530 0.1570 0.1606                                                                                                                                      |  |
| Galeus_melastomus             | 0.2032 0.1979 0.2021 0.2011 0.2030 0.2033 0.2023 0.2098 0.2027                                                                                                                               |  |
| Glyphis_gangeticus            | 0.1208 0.1170 0.1186 0.1177 0.1097 0.1225 0.1145 0.1516 0.1635 0.2131                                                                                                                        |  |
| Halaehurus_buengeri           | 0.2201 0.2191 0.2149 0.2230 0.2230 0.2162 0.2185 0.2298 0.2337 0.2065 0.2343                                                                                                                 |  |
| Hemigaleus_microstoma         | 0.1731 0.1680 0.1671 0.1723 0.1721 0.1717 0.1709 0.1747 0.1889 0.2248 0.1754 0.2352                                                                                                          |  |
| Lamiopsis_tephrodes           | 0.1172 0.1222 0.1154 0.1181 0.1143 0.1273 0.1170 0.1478 0.1647 0.2144 0.0911 0.2332 0.1774                                                                                                   |  |
| Loxodon_macrorhinus           | 0.1393 0.1436 0.1430 0.1430 0.1412 0.1443 0.1410 0.1522 0.1705 0.2033 0.1535 0.2267 0.1743 0.1472                                                                                            |  |
| Mustelus_mustelus             | 0.1579 0.1556 0.1629 0.1542 0.1537 0.1586 0.1506 0.1616 0.1640 0.1841 0.1668 0.2186 0.1720 0.1659 0.1570                                                                                     |  |
| Prionace_glaucia              | 0.0939 0.1010 0.1006 0.0778 0.0868 0.1044 0.0988 0.1507 0.1596 0.1985 0.1325 0.2223 0.1746 0.1324 0.1565 0.1635                                                                              |  |
| Proscyllium_haberei           | 0.1813 0.1764 0.1816 0.1815 0.1754 0.1793 0.1789 0.1894 0.1909 0.1787 0.1914 0.2136 0.2027 0.1904 0.1807 0.1655 0.1851                                                                       |  |
| Scoliodon_laticaudus          | 0.1764 0.1753 0.1755 0.1819 0.1770 0.1796 0.1746 0.1822 0.1834 0.2082 0.1849 0.2295 0.2052 0.1810 0.1596 0.1858 0.1827 0.1920                                                                |  |
| Sphyrna_lewini                | 0.1393 0.1407 0.1426 0.1380 0.1396 0.1413 0.1416 0.1190 0.1705 0.2139 0.1455 0.2234 0.1733 0.1479 0.1513 0.1703 0.1491 0.1899 0.1862                                                         |  |
| Triaenodon_obesus             | 0.0832 0.0965 0.0883 0.0897 0.0795 0.1002 0.0897 0.1511 0.1630 0.2085 0.1253 0.2302 0.1737 0.1266 0.1500 0.1629 0.1072 0.1843 0.1826 0.1459                                                  |  |
| Poroderma_pantherinum         | 0.2197 0.2228 0.2251 0.2247 0.2208 0.2186 0.2180 0.2208 0.2276 0.2147 0.2245 0.2378 0.2335 0.2287 0.2156 0.2146 0.2224 0.2047 0.2237 0.2192 0.2211                                           |  |
| Scyliorhinus_torazame         | 0.2205 0.2257 0.2286 0.2281 0.2201 0.2268 0.2212 0.2268 0.2319 0.2170 0.2318 0.2412 0.2364 0.2255 0.2216 0.2153 0.2226 0.2072 0.2314 0.2301 0.2265 0.1270                                    |  |
| Scyliorhinus_stellaris        | 0.2372 0.2376 0.2414 0.2427 0.2397 0.2355 0.2374 0.2423 0.2468 0.2318 0.2452 0.2446 0.2540 0.2426 0.2355 0.2287 0.2347 0.2126 0.2423 0.2486 0.2396 0.1571 0.1484                             |  |
| Cephaloscyllium_fasciatum     | 0.2282 0.2263 0.2266 0.2268 0.2247 0.2229 0.2246 0.2314 0.2389 0.2225 0.2312 0.2397 0.2433 0.2360 0.2320 0.2183 0.2253 0.2085 0.2378 0.2371 0.2290 0.1491 0.1432 0.1266 0.1439               |  |
| Cephaloscyllium_umbratile     | 0.2234 0.2191 0.2172 0.2253 0.2223 0.2195 0.2217 0.2224 0.2306 0.2179 0.2264 0.2399 0.2388 0.2240 0.2248 0.2225 0.2289 0.2052 0.2304 0.2342 0.2226 0.1500 0.1426 0.1348 0.1402 0.1119        |  |
| Isurus_oxynchusOutgroup       | 0.2602 0.2580 0.2632 0.2588 0.2608 0.2592 0.2642 0.2535 0.2706 0.2784 0.2526 0.2836 0.2636 0.2634 0.2589 0.2605 0.2653 0.2663 0.2770 0.2509 0.2552 0.2576 0.2672 0.2791 0.2676 0.2724 0.2736 |  |

Table S2 Pairwise genetic distance among Carchariniformes species

| Forward    | 5'-3'                         | Reverse    | 5'-3'                            |
|------------|-------------------------------|------------|----------------------------------|
| ARN16S1    | CCTCGCCTGTTTACCAAAAACATCGCCTC | ARN12Sec4  | GCGGTGGCTGGCAGAGTTTTACC          |
| Scy16sec1  | CCTAGGGATAACAGCGCAAT          | Scy12Ssec2 | TCTTTCCACTTCATTGCTACACCT         |
| ScyND2sec1 | CCCCAGGCCCCATTAATATAGCATC     | ARN12S2    | TGCACCTTCCAGTACACTTACCATGTTACGAC |
| ScyCOIsec1 | TCCTGTCCTTGCGAGCCGGAA         | ARN16S2    | TAATAGCGGCTGCACCATTAGGATGTCCTG   |
| ScyCOIsecF | CATAGTTGTACCCATAGAATCCCT      | ScyND2sec2 | CACCTGAAGTCCAAGCGTT              |
| ScyFor1    | AAACTATCAGCTTATTTATTCGACCAT   | ScyCOIsec2 | ACCTAAAAGTGAACCCGGCTGACC         |
| ScyFor3    | CTTTGAAGCTGCCGATGATACTGAC     | ScyCOIsec2 | TGCCATTAAAAATAAGATACGGGAG        |
| ScyFor5    | AATCAACAGAACGCCTAAATGCAG      | ScyRew2    | GCGATTAATTGTATAAGAAGGTGACCA      |
| ScyFor7    | CTTAACCTTCTTACACACGAGA        | ScyRew4    | TGAGCCTCATCAATAAATAGACACA        |
| ScyFor11   | GACCTCAAGACAACCCACGAGT        | ScyRew6    | TACAAGGGTATTTAACTAGGAAGGCAAT     |
| ScyFor13   | TTTCCAACCATTTAATTCCTCAACACC   | ScyRew8    | AATGGATCAGGTAACATAAAGGGCAAC      |
| ScyCytb1   | TTCTACCTTGAGGCCAATATCCTTC     | ScyRew12   | AATCCTTCTCCTTATTATGCGGCTT        |
| ScyPro1    | AATTCTGCCTAACTGCCCTCT         | Scycytb2   | ATGGTTGTTCTACTGGTTGTCCTCAA       |
| ScyDloop3F | GGTACACCCAAATCTTTAGTGCAT      | ScyDloop4R | ATGTATATATTAAGGTATGTGGGCTATGTCA  |
|            |                               | ScyDloop2R | AAAATAATATATGTGCGCCCTCGTT        |

**TableS3** Primers for *S. stellaris* mitogenome amplifications
